# Supplementary material
Source: PubMed Central journal article supplement (PMC4558399)

A

| JWCI ID | Months between <u>Before</u> and <u>After</u> (For FFPE blocks) | <u>Before</u> Treatment: Total Intensity of ATF2 | <u>After</u> Treatment: Total Intensity of ATF2 | <u>Before</u> Treatment: ATF2 (Nuclear) | <u>After</u> Treatment: ATF2 (Nuclear) | <u>Before</u> Treatment: ATF2 (Cytoplasmic) | <u>After</u> Treatment: ATF2 (Cytoplasmic) | <u>Before</u> Treatment: Total Intensity of IFNB1 | <u>After</u> Treatment: Total Intensity of IFNB1 | Responsiveness (Months between <u>Before</u> / <u>After</u> vs. IFNB1 IHC) | Correct Prediction of Prognosis | After Treatment CD8+ T-cell Status |
|---------|-----------------------------------------------------------------|--------------------------------------------------|-------------------------------------------------|-----------------------------------------|----------------------------------------|---------------------------------------------|--------------------------------------------|---------------------------------------------------|--------------------------------------------------|----------------------------------------------------------------------------|---------------------------------|------------------------------------|
| 2       | 8 mos                                                           | ++                                               | ++++                                            | ++                                      | +++                                    | .                                           | +                                          | +                                                 | .                                                | NR                                                                         | Yes                             | +                                  |
| 3       | 15 mos                                                          | ++                                               | ++                                              | ++                                      | ++                                     | .                                           | .                                          | .                                                 | .                                                | NR                                                                         | Yes                             | ∅                                  |
| 4       | 30 mos                                                          | +                                                | ++++                                            | +                                       | +                                      | .                                           | +++                                        | ++                                                | +++                                              | R                                                                          | Yes                             | +                                  |
| 9       | 7 mos                                                           | ++                                               | ++++                                            | ++                                      | +++                                    | .                                           | +                                          | .                                                 | .                                                | NR                                                                         | Yes                             | .                                  |
| 13      | 10 mos                                                          | ++++                                             | ++++                                            | ++++                                    | ++                                     | .                                           | ++                                         | +                                                 | +++                                              | NR                                                                         | No                              | +                                  |
| 16      | 31 mos                                                          | ++                                               | ++++                                            | +                                       | +                                      | +                                           | +++                                        | +                                                 | +++                                              | R                                                                          | Yes                             | +                                  |
| 17      | 49 mos                                                          | ++++                                             | +++                                             | ++                                      | .                                      | ++                                          | +++                                        | +                                                 | ++                                               | R                                                                          | Yes                             | .                                  |
| 18      | 19 mos                                                          | ++                                               | +++                                             | ++                                      | .                                      | .                                           | +++                                        | .                                                 | +++                                              | R                                                                          | Yes                             | +                                  |
| 21      | 34 mos                                                          | +                                                | ++                                              | .                                       | +                                      | +                                           | +                                          | +++                                               | ++                                               | R                                                                          | No                              | ∅                                  |

B

| UPCC ID | <u>Before</u> Treatment: Total Intensity of ATF2 | <u>After</u> Treatment: Total Intensity of ATF2 | <u>Before</u> Treatment: ATF2 (Nuclear) | <u>After</u> Treatment: ATF2 (Nuclear) | <u>Before</u> Treatment: ATF2 (Cytoplasmic) | <u>After</u> Treatment: ATF2 (Cytoplasmic) | <u>Before</u> Treatment: Total Intensity of IFNB1 | <u>After</u> Treatment: Total Intensity of IFNB1 | Clinical partial response vs. no response (Months between <u>Before</u> / <u>After</u> vs. IFNB1 IHC) | Correct Prediction of Prognosis | After Treatment CD8+ T-cell Status |
|---------|--------------------------------------------------|-------------------------------------------------|-----------------------------------------|----------------------------------------|---------------------------------------------|--------------------------------------------|---------------------------------------------------|--------------------------------------------------|-------------------------------------------------------------------------------------------------------|---------------------------------|------------------------------------|
| 801     | +                                                | .                                               | +++                                     | ++                                     | +                                           | ++                                         | +                                                 | .                                                | CR                                                                                                    | Yes                             | +                                  |
| 806     | .                                                | +                                               | ++                                      | +++                                    | ++                                          | +                                          | +                                                 | .                                                | PR                                                                                                    | No                              | .                                  |
| 807     | +                                                | +                                               | ++                                      | +                                      | ++                                          | +                                          | .                                                 | +                                                | NR                                                                                                    | Yes                             | .                                  |
| 809     | .                                                | +                                               | ++                                      | ++                                     | ++                                          | ++                                         | +                                                 | .                                                | NR                                                                                                    | Yes                             | .                                  |
| 810     | .                                                | +                                               | ++++                                    | ++                                     | .                                           | ++                                         | .                                                 | +                                                | NR                                                                                                    | No                              | +                                  |
| 812     | .                                                | +                                               | +++                                     | ++                                     | +                                           | ++                                         | .                                                 | +                                                | PR                                                                                                    | Yes                             | +                                  |
| 813     | +                                                | .                                               | ++                                      | +++                                    | ++                                          | +                                          | .                                                 | .                                                | PR                                                                                                    | Yes                             | +                                  |
| 814     | +                                                | .                                               | ++++                                    | ++                                     | .                                           | ++                                         | +                                                 | +                                                | PR                                                                                                    | Yes                             | ∅                                  |
| 815     | .                                                | +                                               | ++++                                    | ++++                                   | .                                           | .                                          | +                                                 | .                                                | PR                                                                                                    | No                              | .                                  |
| 817     | +                                                | +                                               | +++                                     | ++++                                   | +                                           | .                                          | .                                                 | +                                                | PR                                                                                                    | Yes                             | .                                  |
| 819     | .                                                | +                                               | +++                                     | ++++                                   | .                                           | .                                          | .                                                 | +                                                | PR                                                                                                    | No                              | .                                  |
| 821     | +                                                | +                                               | ++                                      | ++++                                   | ++                                          | .                                          | +                                                 | +                                                | NR                                                                                                    | Yes                             | +                                  |

C

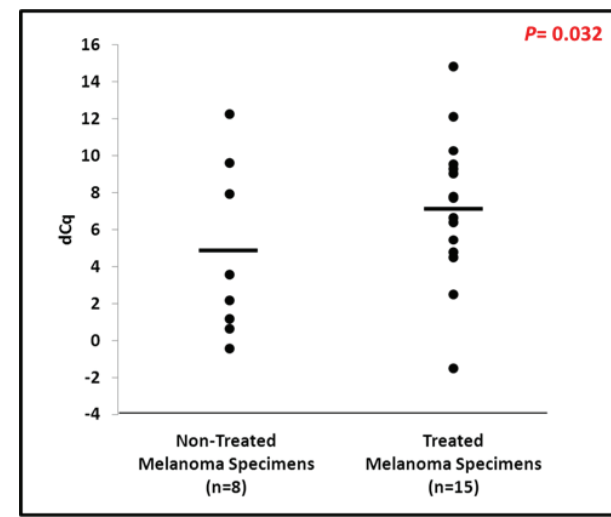

Supplement: NIHMS653558-supplement-7.pdf [file NIHMS653558-supplement-7.pdf]
