# Supplementary material
Source: PubMed Central journal article supplement (PMC4558399)

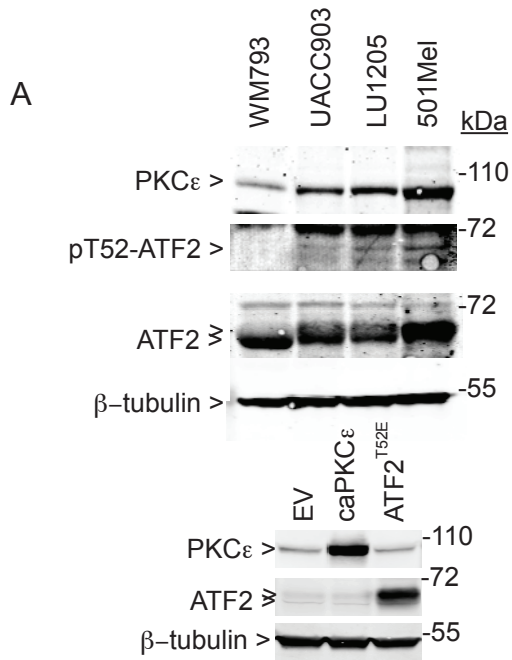

**B**

### ATF2<sup>T52E</sup> vs. ATF2<sup>T52A</sup> + ETO

100 altered genes ( $p < 0.05$ )

#### Top 4 canonical signaling pathways

Interferon signaling  
 GDP-L-fucose biosynthesis II  
 NADH repair  
 IRF signaling

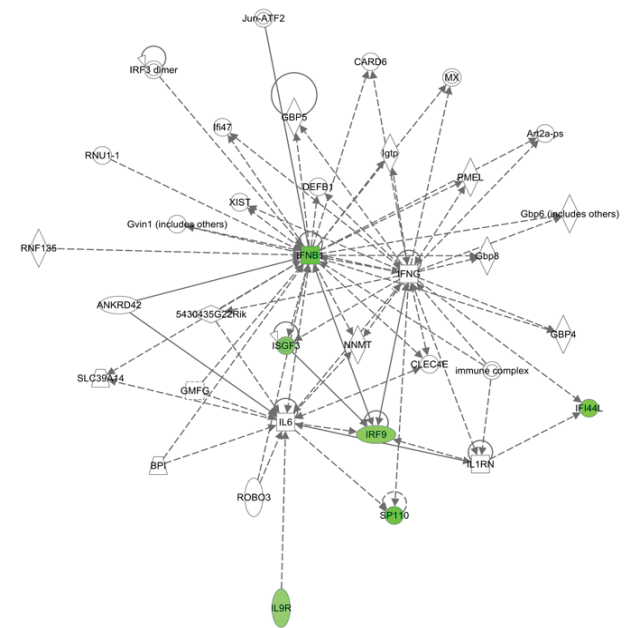

**C**

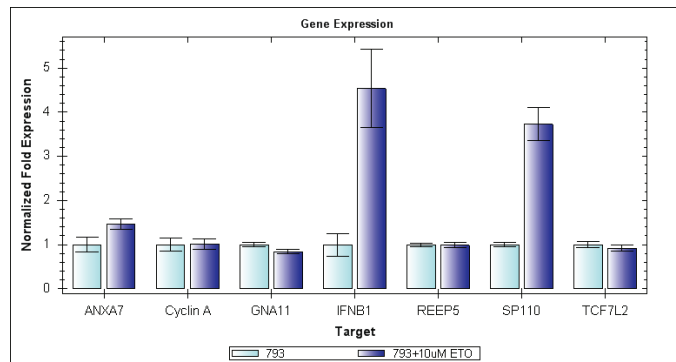

**D**

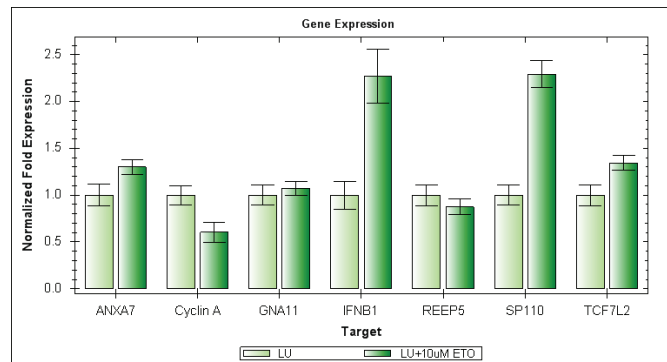

**G**

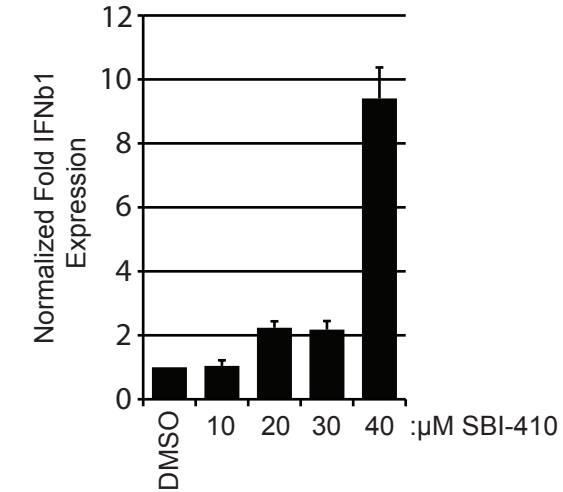

**E**

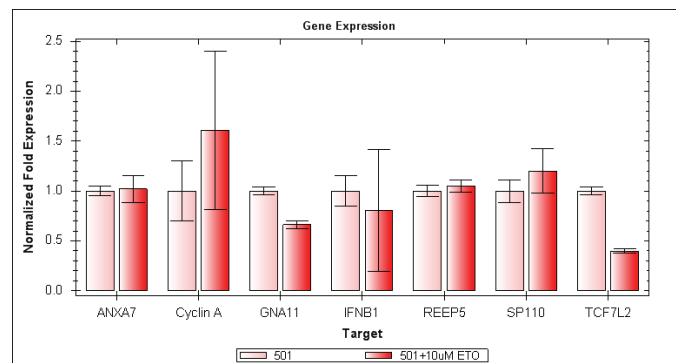

**F**

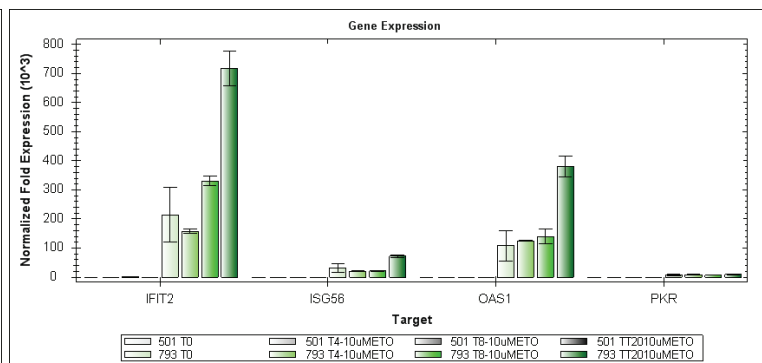

**H**

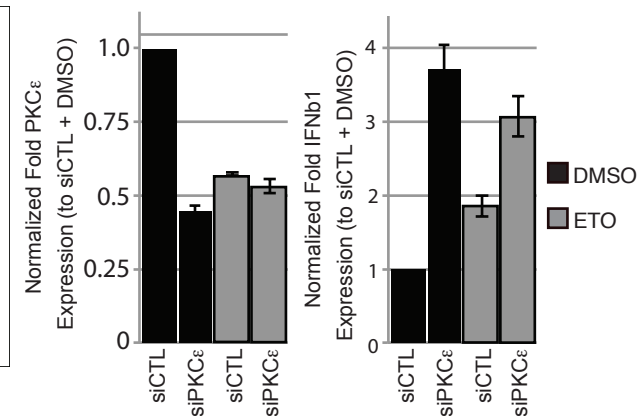

Supplement: NIHMS653558-supplement-2.pdf [file NIHMS653558-supplement-2.pdf]
