# Supplementary material
Source: PubMed Central journal article supplement (PMC4558399)
Supplement: NIHMS653558-supplement-9.pdf [file NIHMS653558-supplement-9.pdf]

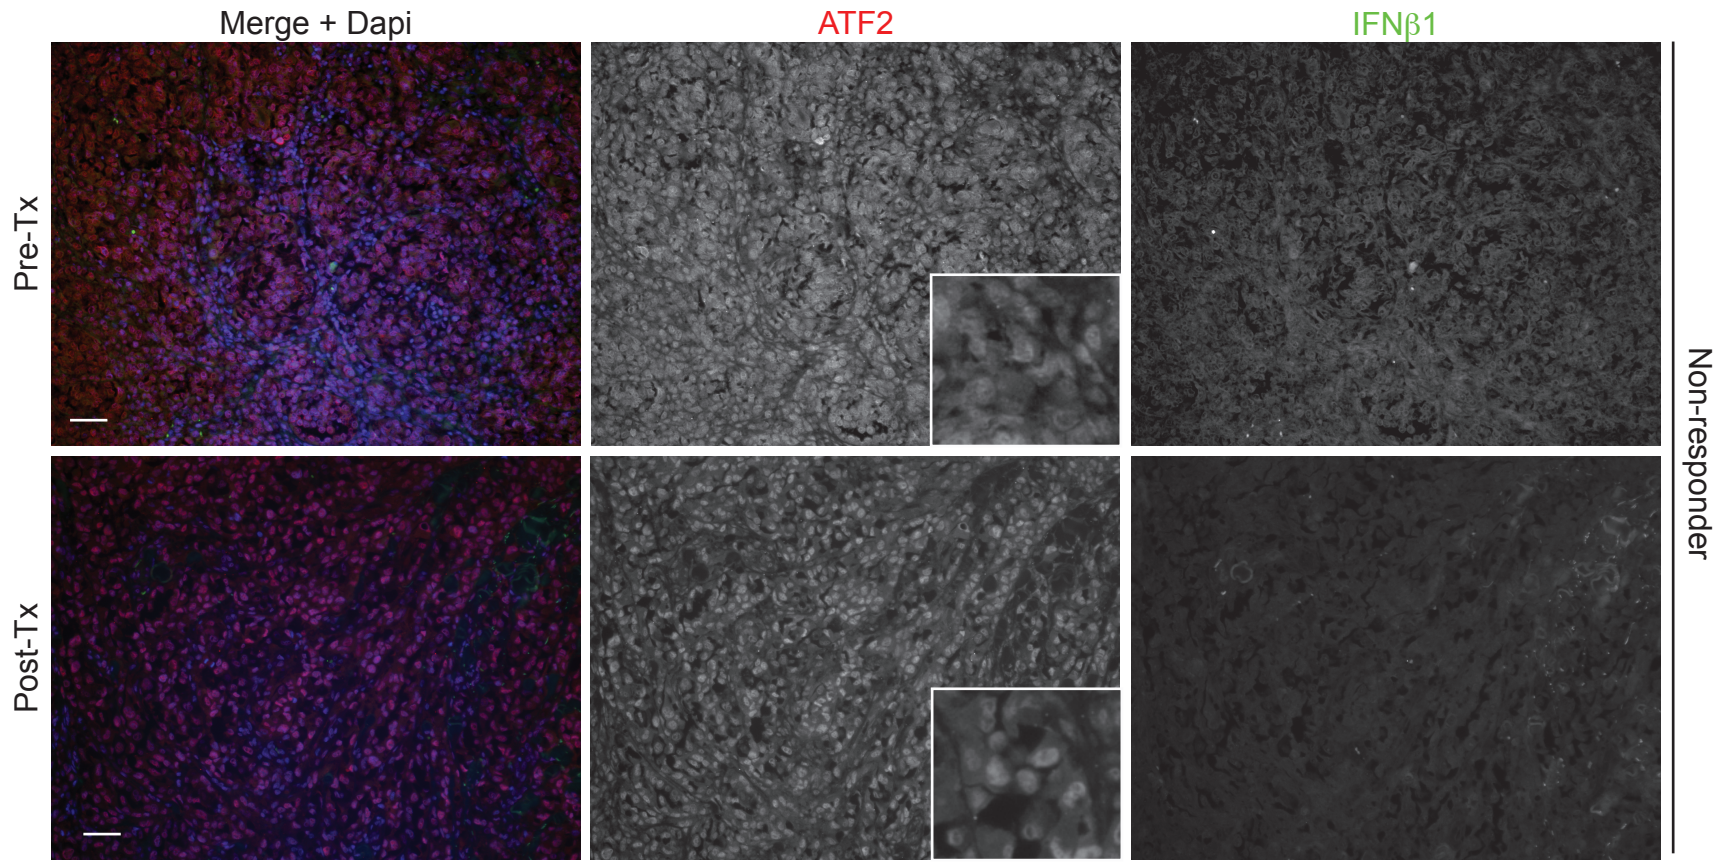

| UZH ID | Months between <u>Before</u> and <u>After</u><br>(For FFPE blocks) | <u>Before</u> Treatment: Total Intensity of ATF2 | <u>After</u> Treatment: Total Intensity of ATF2 | <u>Before</u> Treatment: ATF2 (Nuclear) | <u>After</u> Treatment: ATF2 (Nuclear) | <u>Before</u> Treatment: ATF2 (Cytoplasmic) | <u>After</u> Treatment: ATF2 (Cytoplasmic) | <u>Before</u> Treatment: Total Intensity of IFNβ1 | <u>After</u> Treatment: Total Intensity of IFNβ1 | Responsiveness (Months between Before/After vs. IFNβ1 IHC) |
|--------|--------------------------------------------------------------------|--------------------------------------------------|-------------------------------------------------|-----------------------------------------|----------------------------------------|---------------------------------------------|--------------------------------------------|---------------------------------------------------|--------------------------------------------------|------------------------------------------------------------|
| 4247   | 11 mos                                                             | +++                                              | +++                                             | ++                                      | +++                                    | ++                                          | +                                          | +                                                 | .                                                | NR                                                         |
| 4230   | 2 mos                                                              | +++                                              | +++                                             | ++                                      | +++                                    | ++                                          | +                                          | +                                                 | .                                                | NR                                                         |
| 41357  | 10 mos                                                             | +++                                              | +++                                             | ++                                      | ++++                                   | ++                                          | .                                          | +                                                 | .                                                | NR                                                         |
| 4639   | 10 mos                                                             | +++                                              | +++                                             | ++                                      | +++                                    | ++                                          | +                                          | +                                                 | .                                                | NR                                                         |
| 08     | 23 mos                                                             | +++                                              | +++                                             | +                                       | +++                                    | +++                                         | +                                          | +                                                 | .                                                | NR                                                         |
