# Supplementary material
Source: PubMed Central journal article supplement (PMC4558399)
Supplement: NIHMS653558-supplement-10.pdf [file NIHMS653558-supplement-10.pdf]

### Supplemental Table 1

Top 100 differentially expressed genes in etoposide-treated WM793 cells depleted of endogenous ATF2 and reconstituted with ATF2<sup>T52E</sup> (compared to ATF2<sup>T52A</sup>),  $p < 0.05$

| Gene                      | log(2)FC | p-value |
|---------------------------|----------|---------|
| LOC100129213              | -0.863   | 0.00057 |
| C1orf201                  | -0.683   | 0.04778 |
| <b>IFNB1</b>              | -0.663   | 0.04169 |
| LOC731511                 | -0.632   | 0.00442 |
| <b>SP110</b>              | -0.601   | 0.01216 |
| Hs.46693                  | -0.594   | 0.03209 |
| ATP4A                     | -0.579   | 0.00628 |
| MIR542                    | -0.549   | 0.04569 |
| LOC286135                 | -0.54    | 0.02488 |
| APLN                      | -0.531   | 0.02921 |
| DNAJA4                    | -0.521   | 0.04004 |
| LOC100127937              | -0.52    | 0.02553 |
| CCDC54                    | -0.518   | 0.04215 |
| Hs.538121                 | -0.509   | 0.04188 |
| Hs.538460                 | -0.498   | 0.0409  |
| NYX                       | -0.494   | 0.03027 |
| ART1                      | -0.492   | 0.03271 |
| <b>Hs.125087 (IFI44L)</b> | -0.487   | 0.00963 |
| LOC100134068              | -0.478   | 0.03213 |
| EFCAB4B                   | -0.463   | 0.04571 |
| Hs.539563                 | -0.456   | 0.03272 |
| KNCN                      | -0.453   | 0.0394  |
| C7orf42                   | -0.451   | 0.04484 |
| ASPA                      | -0.44    | 0.04264 |
| TMEM62                    | -0.435   | 0.03385 |
| LOC642843                 | -0.434   | 0.01822 |
| UBE2K                     | -0.432   | 0.04987 |
| <b>IRF9</b>               | -0.427   | 0.04208 |
| FLJ44790                  | -0.425   | 0.04332 |
| C22orf24                  | -0.425   | 0.01556 |
| LOC554207                 | -0.422   | 0.04795 |
| Hs.495080                 | -0.421   | 0.04531 |
| AIFM2                     | -0.42    | 0.036   |
| LOC100134083              | -0.416   | 0.02036 |
| LOC653034                 | -0.415   | 0.03877 |
| TMEM129                   | -0.414   | 0.03683 |
| PCBP3                     | -0.404   | 0.01946 |
| Hs.269011                 | -0.404   | 0.03681 |
| LOC727721                 | -0.404   | 0.04135 |
| LOC727992                 | -0.396   | 0.03817 |
| LOC651876                 | -0.395   | 0.04691 |
| Hs.539402                 | -0.394   | 0.04416 |

\*Yellow highlight indicates IFN-signaling related genes

|              |        |         |
|--------------|--------|---------|
| LOC644863    | -0.388 | 0.04403 |
| IL9R         | -0.383 | 0.02    |
| Hs.156892    | -0.377 | 0.03129 |
| PSMD13       | -0.367 | 0.0437  |
| MYF5         | -0.349 | 0.02799 |
| BRF2         | -0.331 | 0.04807 |
| LOC652175    | -0.325 | 0.04789 |
| C1orf190     | 0.334  | 0.04059 |
| FUK          | 0.356  | 0.04406 |
| OIT3         | 0.357  | 0.04595 |
| IQCE         | 0.362  | 0.04572 |
| LOC401860    | 0.365  | 0.03549 |
| ZNF696       | 0.367  | 0.04057 |
| NECAB1       | 0.376  | 0.04083 |
| SLC4A1AP     | 0.38   | 0.0315  |
| Hs.233165    | 0.395  | 0.01798 |
| LOC285735    | 0.403  | 0.0303  |
| APOA1BP      | 0.404  | 0.03271 |
| Hs.540121    | 0.408  | 0.02368 |
| NUDT12       | 0.41   | 0.03404 |
| LOC100132549 | 0.412  | 0.03634 |
| LOC731898    | 0.417  | 0.02422 |
| LOC100132308 | 0.418  | 0.03051 |
| ZNF620       | 0.422  | 0.03057 |
| LOC100128406 | 0.423  | 0.04483 |
| KIAA1731     | 0.424  | 0.03423 |
| KCNJ12       | 0.428  | 0.03532 |
| HIPK2        | 0.431  | 0.04695 |
| PPP1R9A      | 0.436  | 0.03662 |
| SNORA19      | 0.44   | 0.02469 |
| MIR548A1     | 0.442  | 0.02419 |
| LOC730754    | 0.449  | 0.0461  |
| ZMYM1        | 0.45   | 0.04284 |
| PCDHA4       | 0.47   | 0.0471  |
| LOC728395    | 0.475  | 0.02892 |
| LOC728887    | 0.483  | 0.01734 |
| LOC645194    | 0.496  | 0.03574 |
| DSG3         | 0.497  | 0.01304 |
| CCDC102A     | 0.504  | 0.03536 |
| Hs.538804    | 0.512  | 0.04857 |
| LOC652838    | 0.52   | 0.00946 |
| LOC727855    | 0.522  | 0.01185 |
| LOC100130556 | 0.535  | 0.02401 |
| ATPAF2       | 0.583  | 0.0421  |
| CHST4        | 0.618  | 0.02216 |
| CPSF3        | 0.618  | 0.02522 |
| LOC652641    | 0.62   | 0.00717 |
| SNORD95      | 0.626  | 0.04286 |
| Hs.560740    | 0.629  | 0.02753 |

|              |       |         |
|--------------|-------|---------|
| RNASET2      | 0.632 | 0.04893 |
| ANKRD19      | 0.659 | 0.03957 |
| Hs.296031    | 0.705 | 0.03941 |
| ANGEL2       | 0.774 | 0.04823 |
| CANT1        | 0.799 | 0.0357  |
| LOC100133095 | 0.89  | 0.00826 |
| RFX1         | 0.909 | 0.02669 |
| SH3GL3       | 1.043 | 0.04835 |
| HDAC3        | 1.177 | 0.03818 |
