# Supplementary material
Source: PubMed Central journal article supplement (PMC4558399)

A

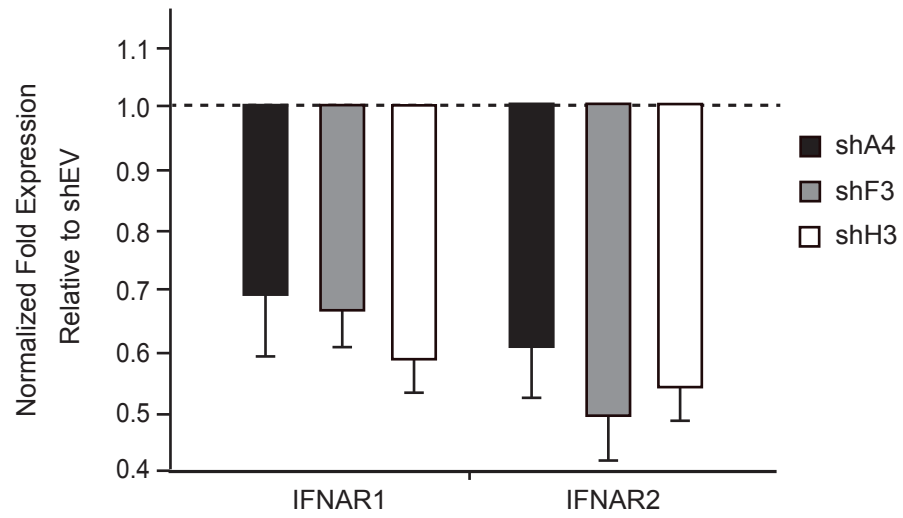

B

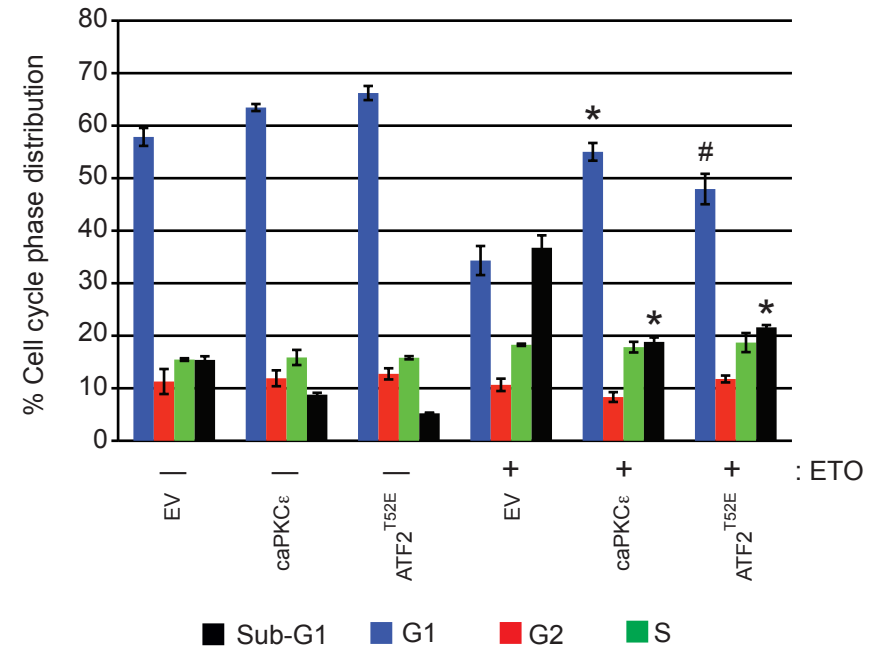

C

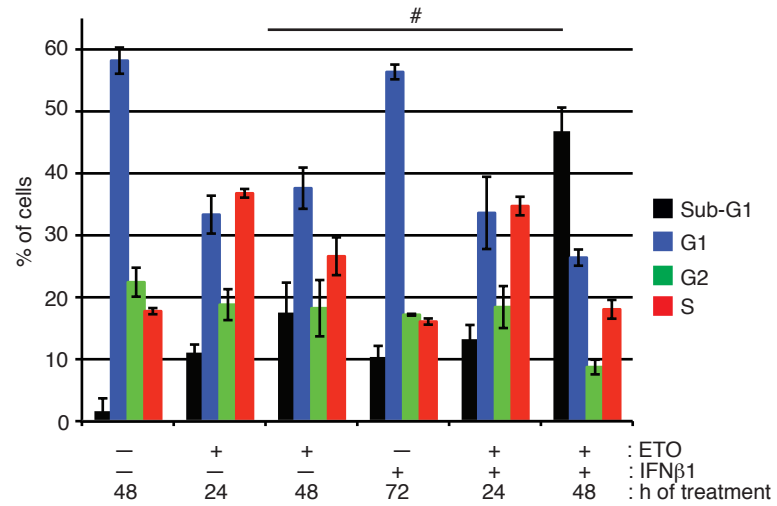

D

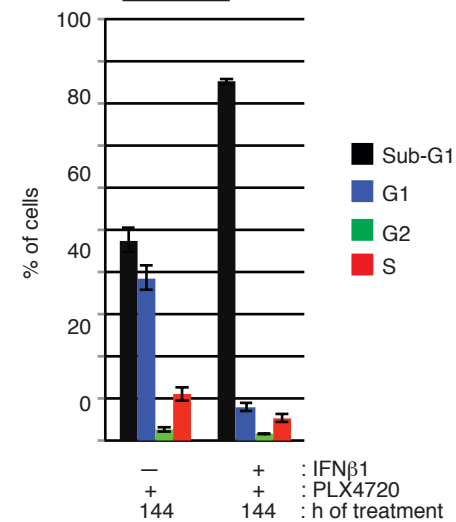

Supplement: NIHMS653558-supplement-3.pdf [file NIHMS653558-supplement-3.pdf]

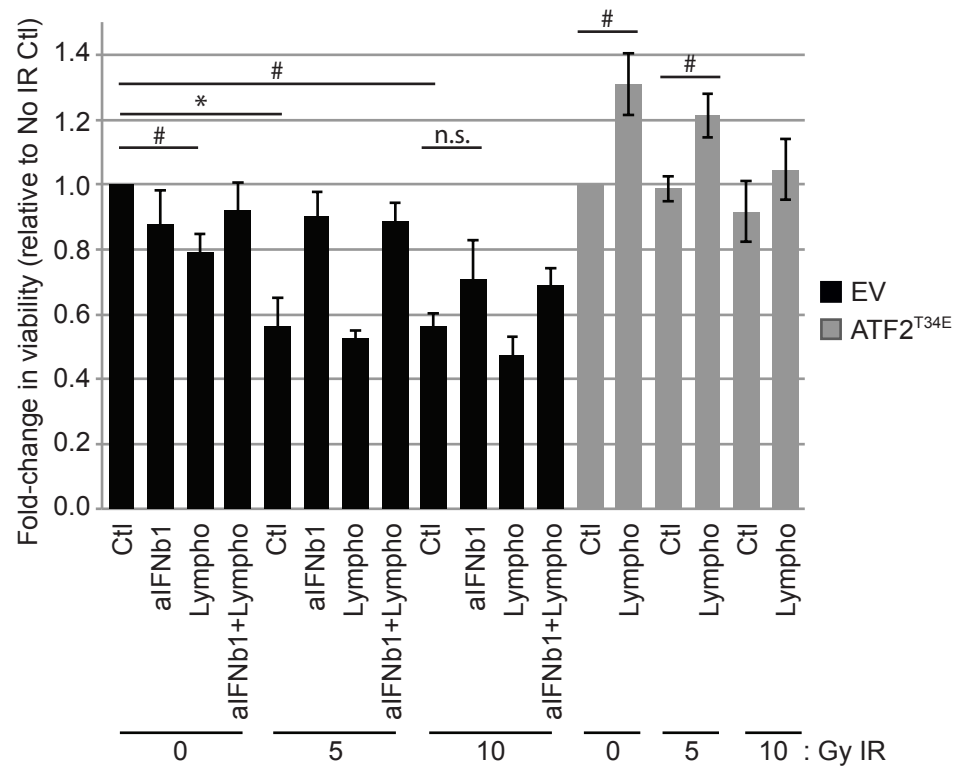

Supplement: NIHMS653558-supplement-4.pdf [file NIHMS653558-supplement-4.pdf]

A

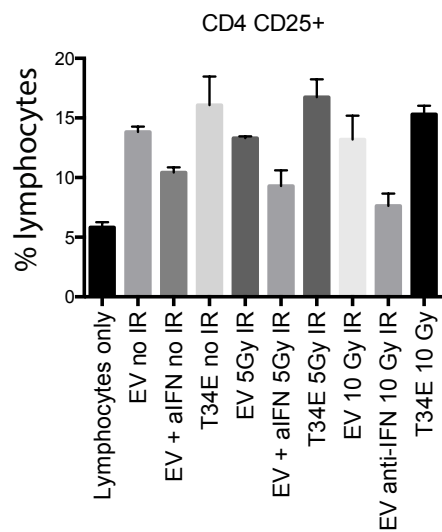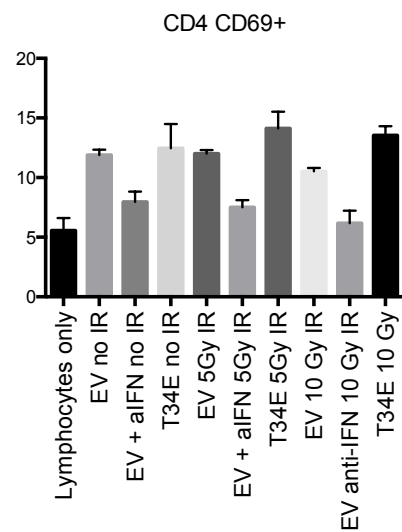

B

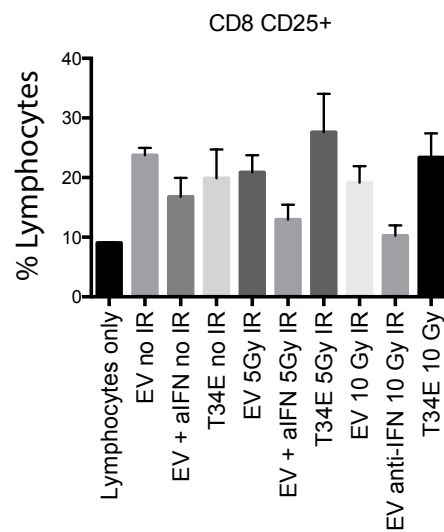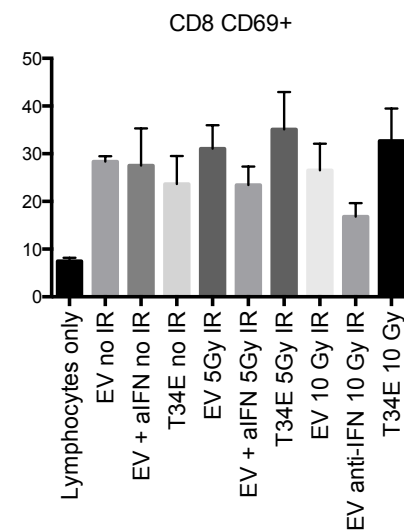

C

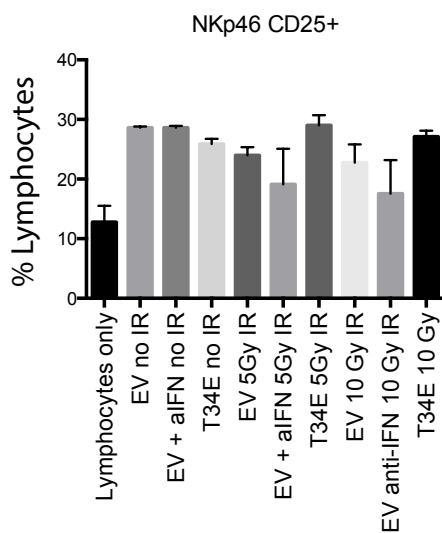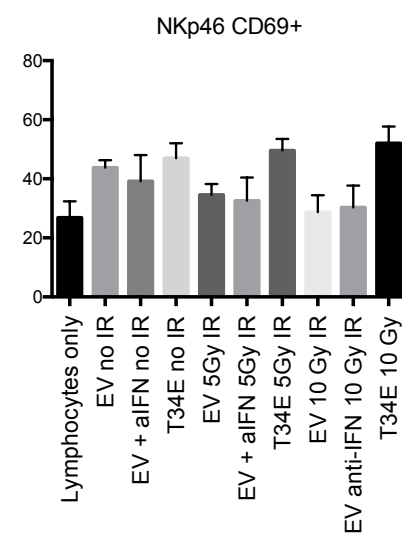

D

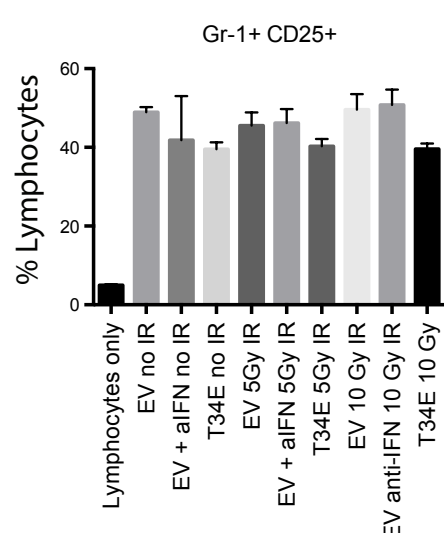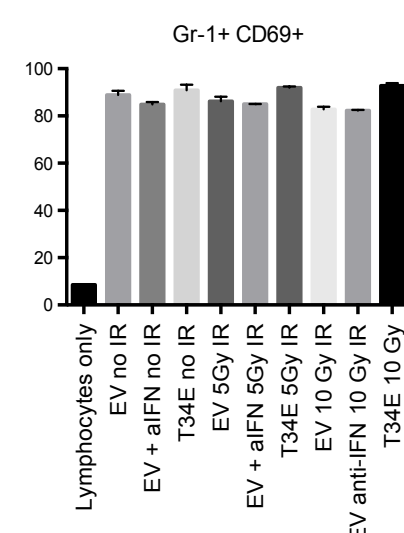

Supplement: NIHMS653558-supplement-5.pdf [file NIHMS653558-supplement-5.pdf]

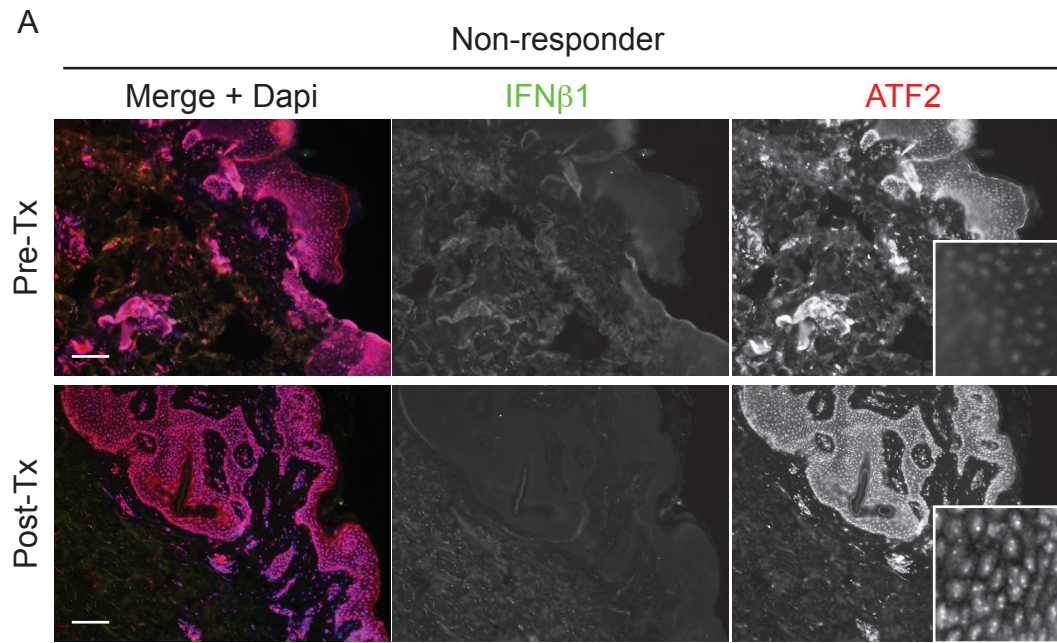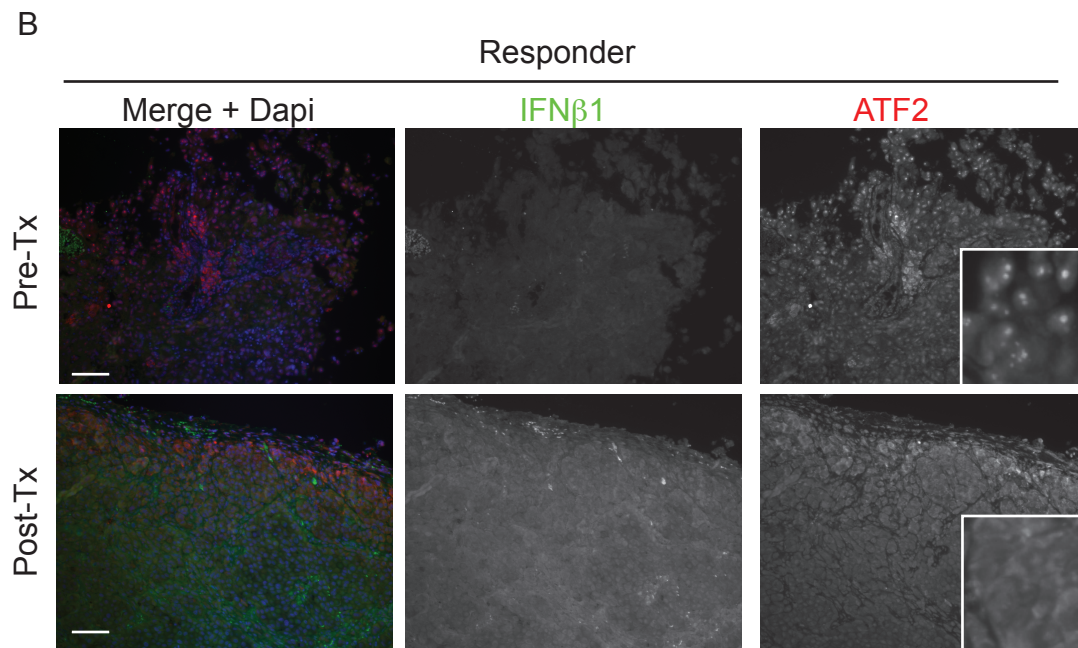

Supplement: NIHMS653558-supplement-6.pdf [file NIHMS653558-supplement-6.pdf]

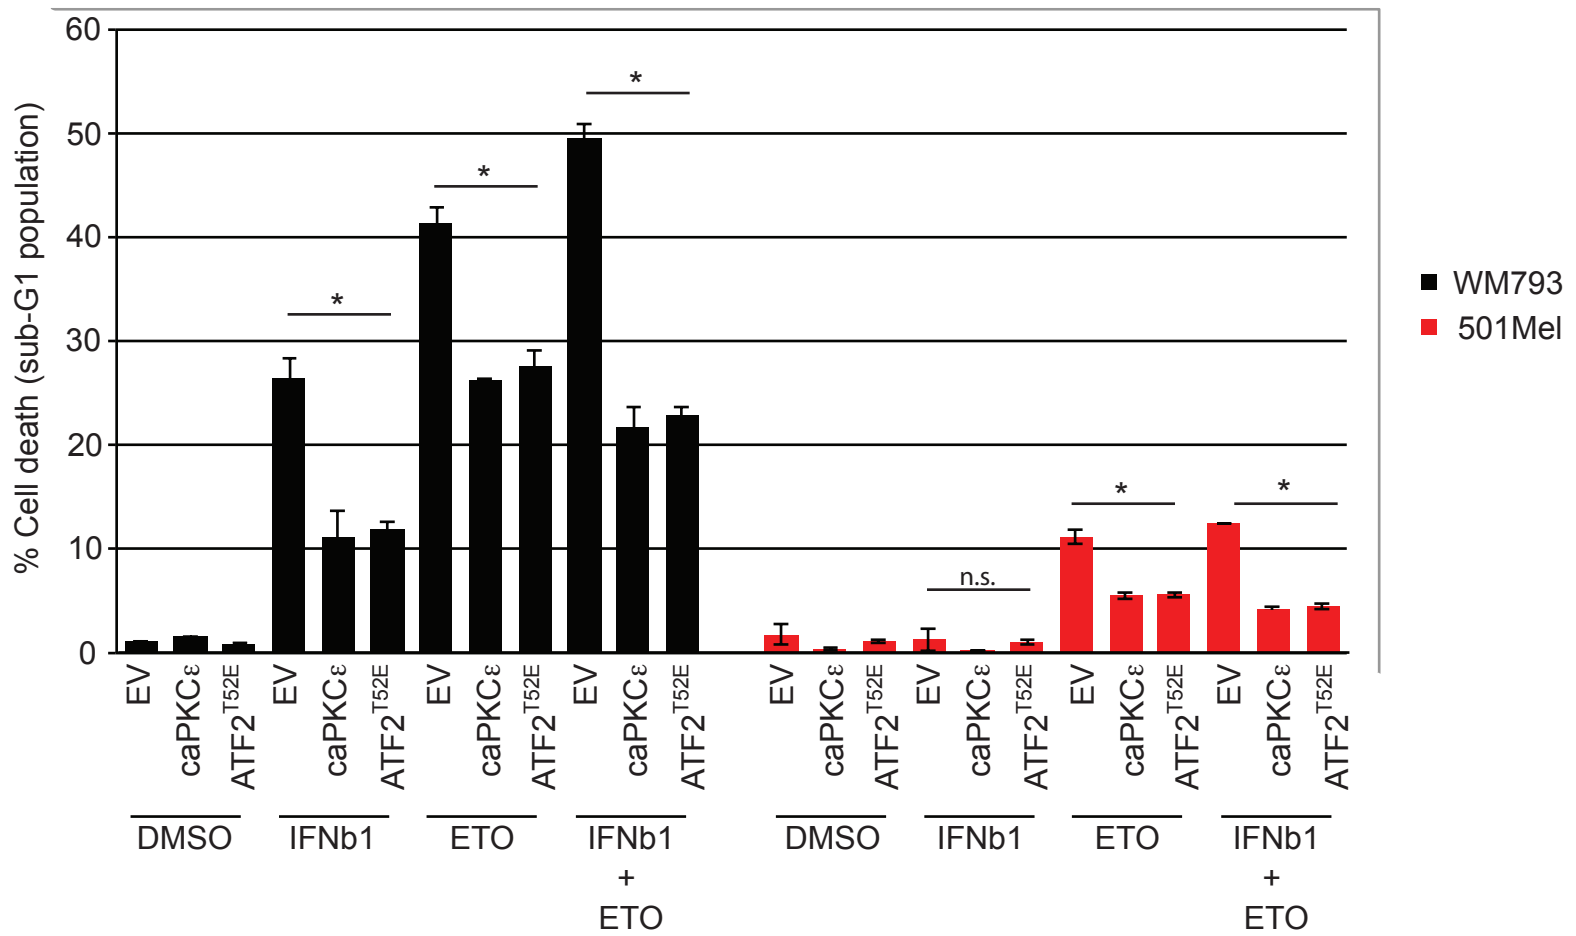

Supplement: NIHMS653558-supplement-8.pdf [file NIHMS653558-supplement-8.pdf]
